# Supplementary material for: (Pro)renin Receptor–Mediated Signal Transduction and Tissue Renin-Angiotensin System Contribute to Diabetes-Induced Retinal Inflammation
Source: Oxford University Press journal article supplement (doi:10.2337/db08-0254), 2009-04-23

**Suppl Fig. 1. Suppression of angiotensin II-induced ERK activation by losartan or valsartan, but not PRRB.** Stimulation with 100nM of angiotensin II to murine brain-derived capillary endothelial cells (b-End3) led to ERK activation, which was attenuated by treatment with 10 μM of losartan or valsartan, but not 100 μM of PRRB.

**
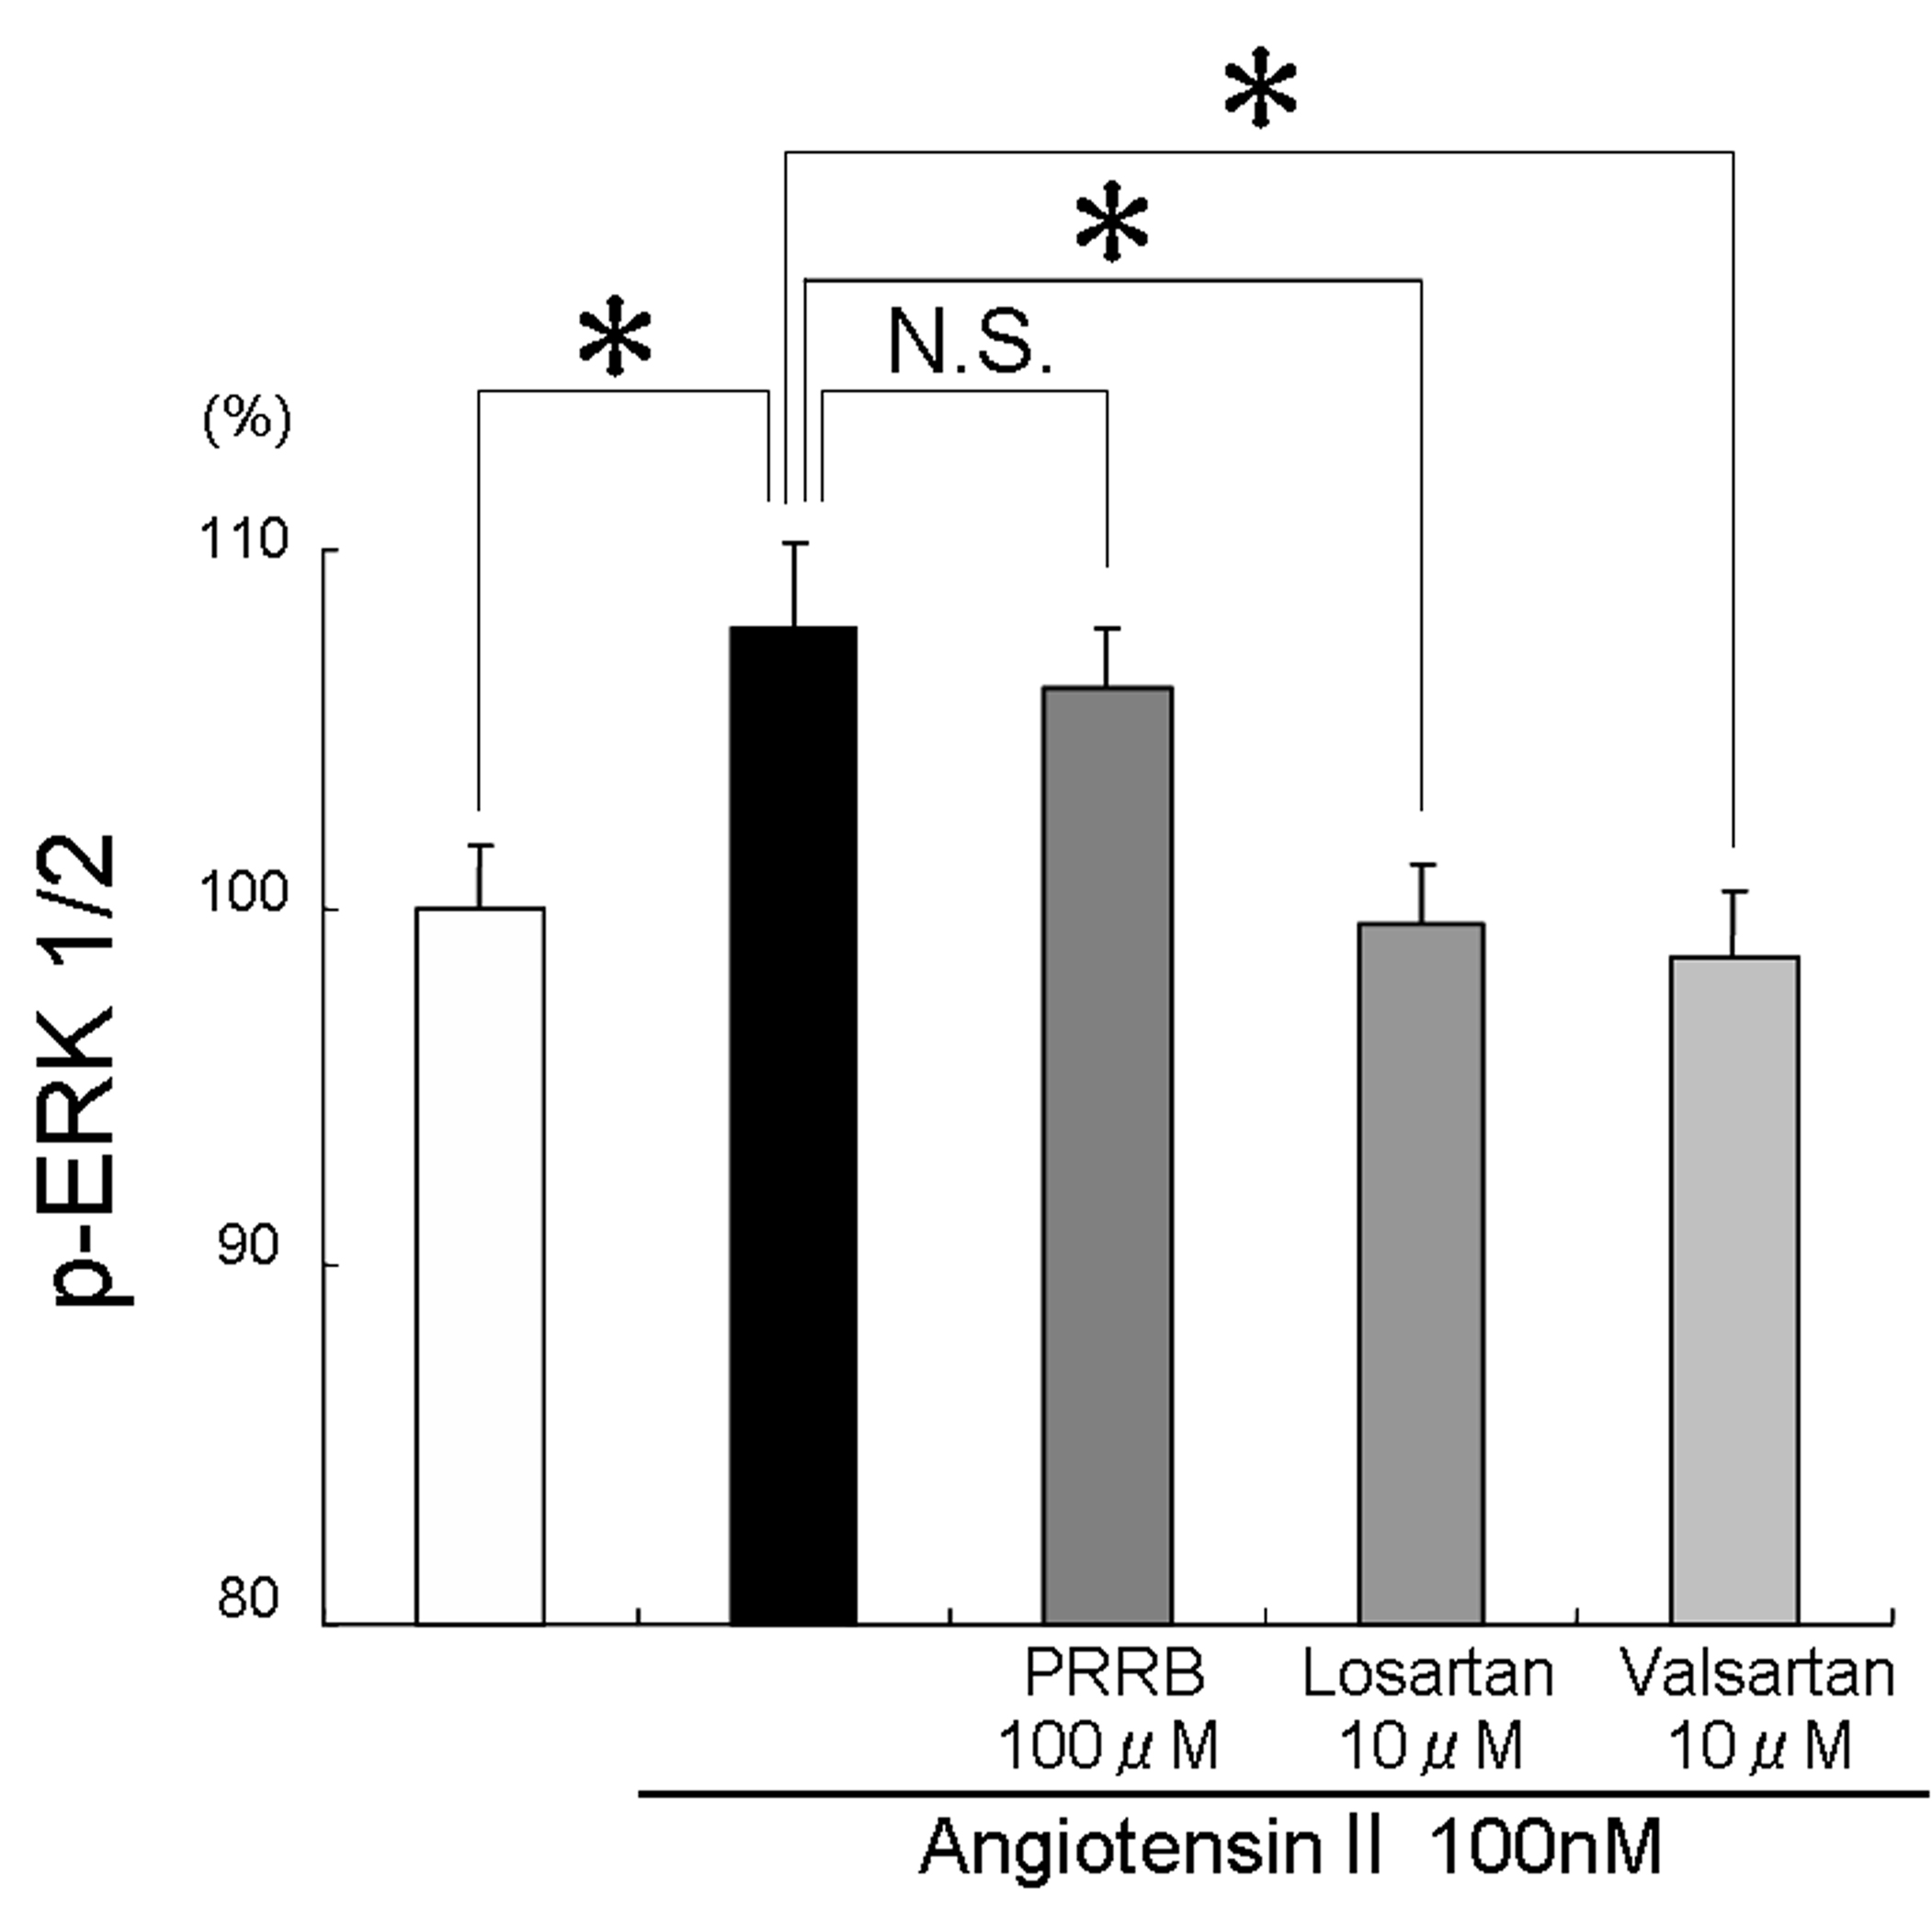
**

**Suppl Fig. 2. Suppression of prorenin-induced ERK activation by PRRB under RAS deactivation with losartan.** In b-End3 cells, stimulation with 2nM of prorenin caused ERK activation under the presence of 10μM of losartan. PRRB application led to dose-dependent reduction of phosphorylated ERK levels below the baseline, suggesting the significance of endogenous prorenin as an ERK activator under RAS deactivation.

**
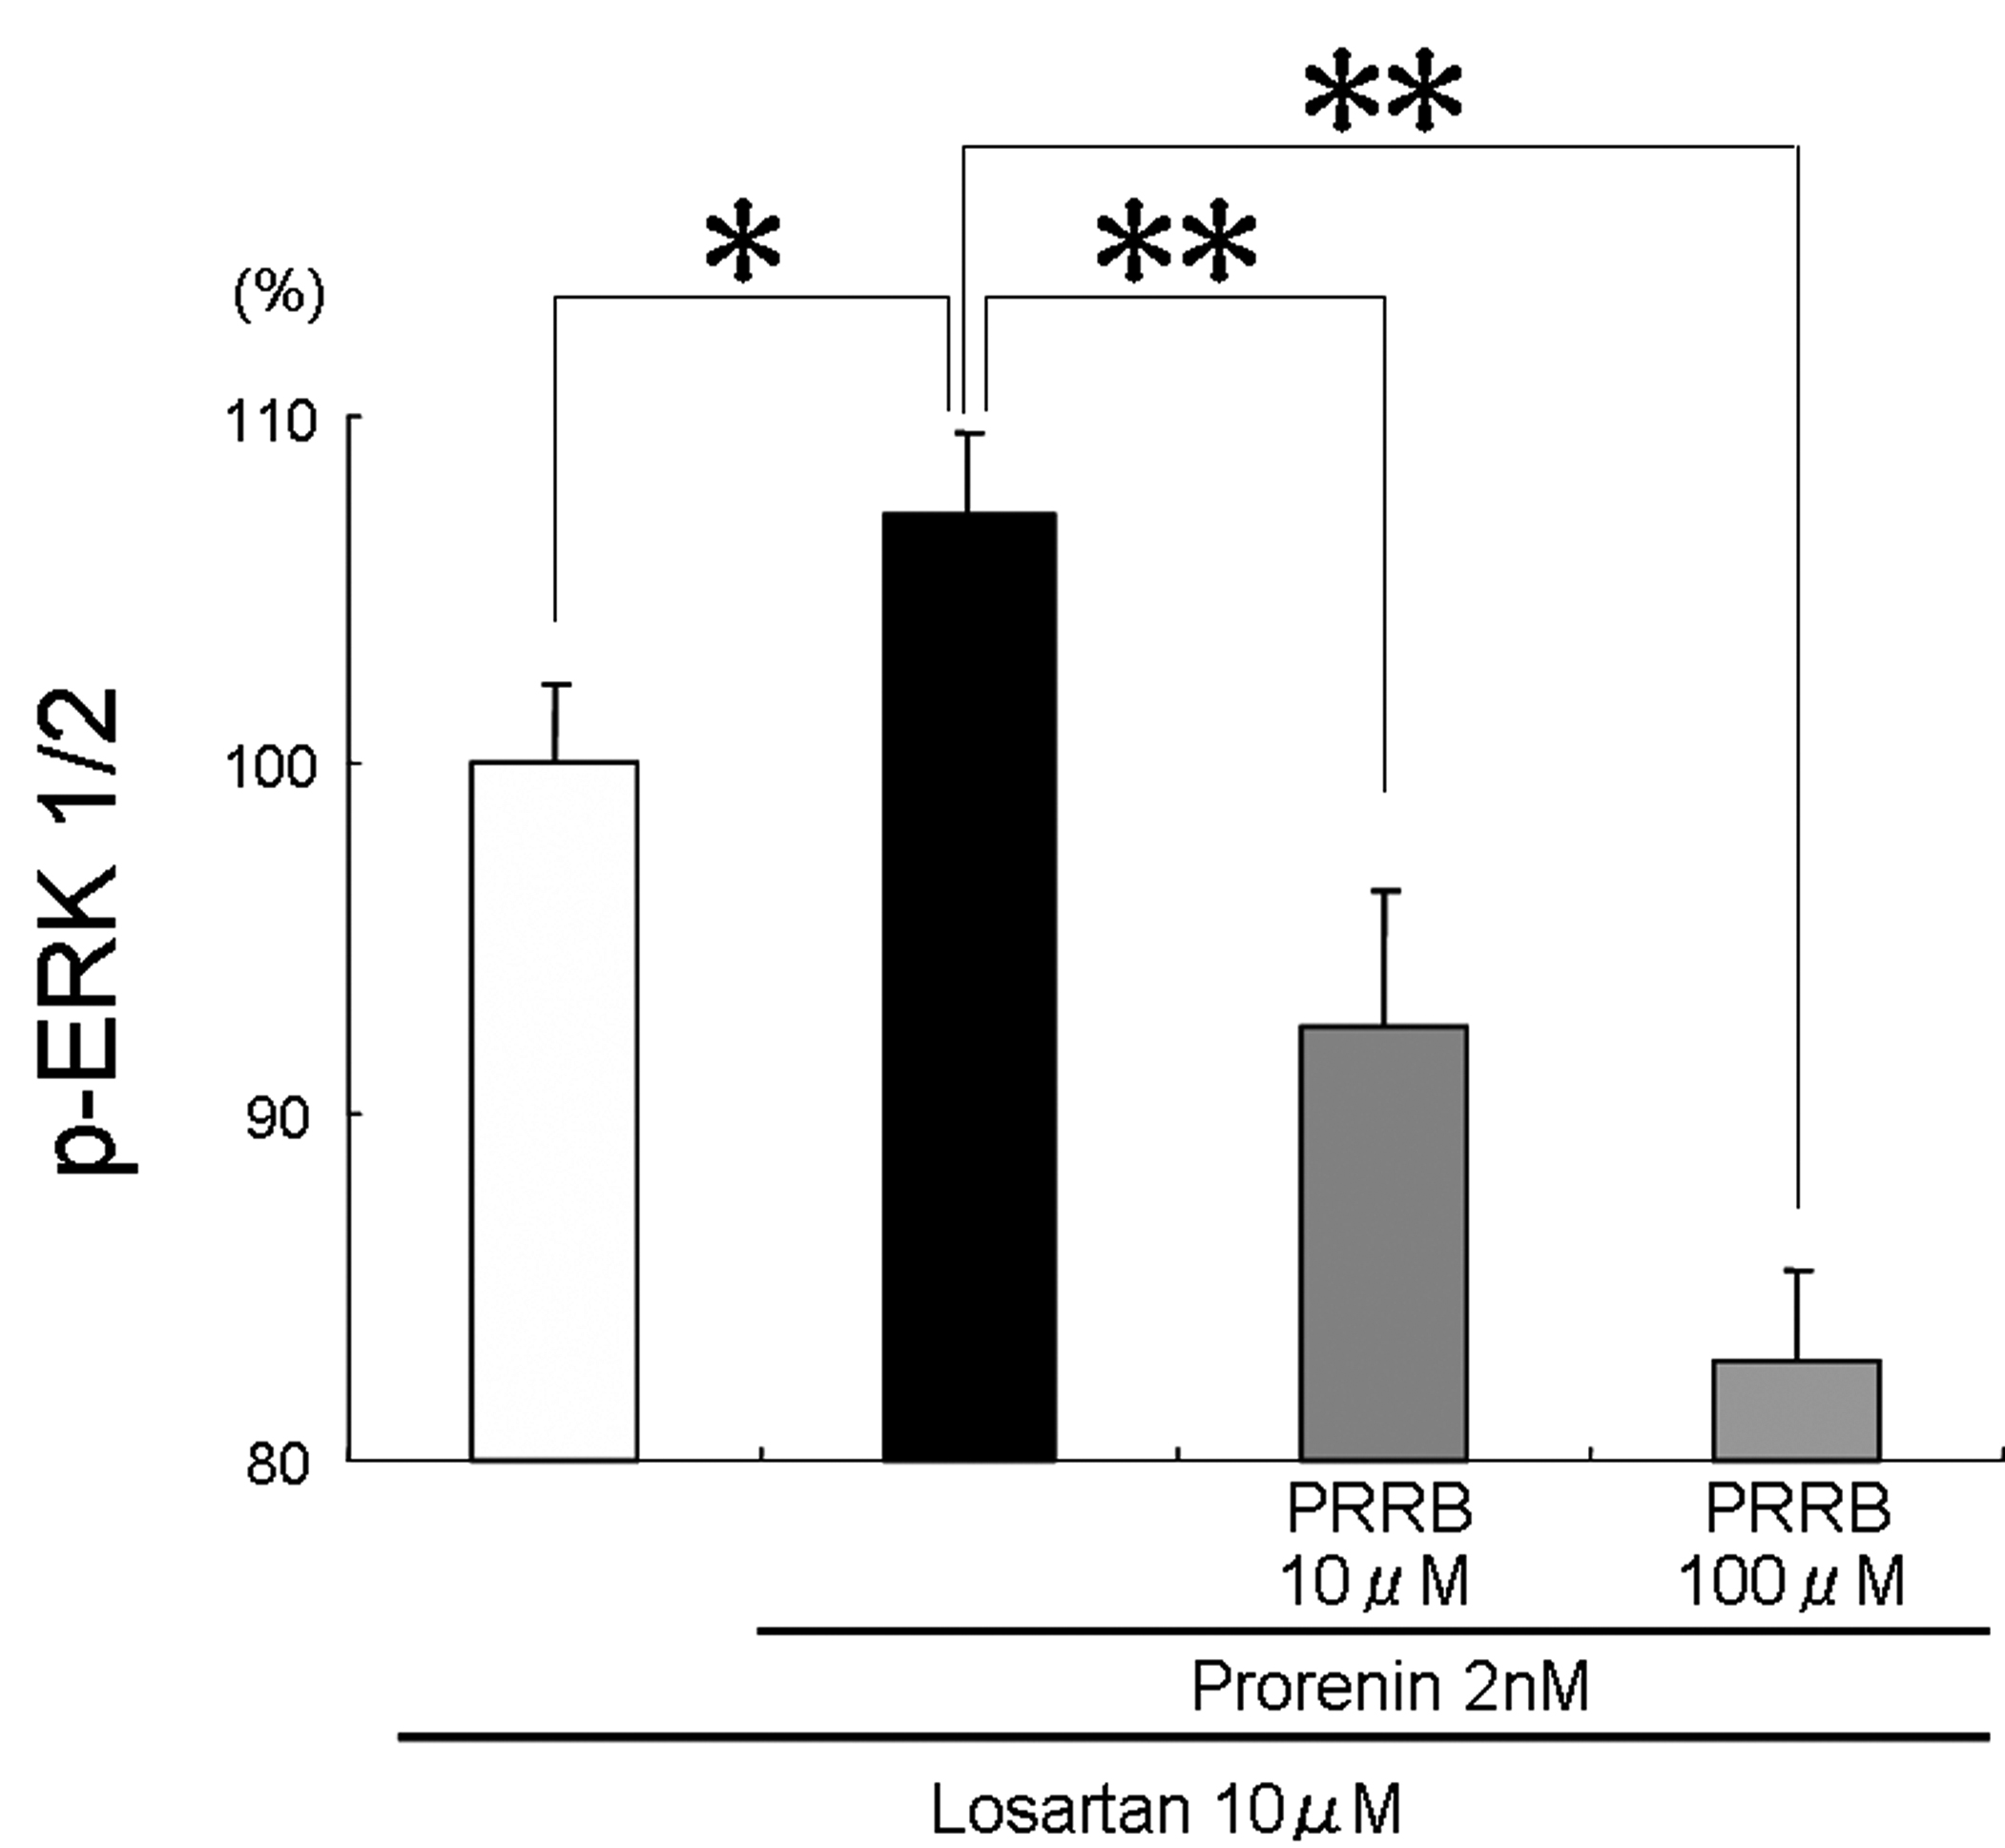
**

**Suppl Fig. 3. Time course of concentration of PRRB after intraperitoneal injection to normal mice.** Following PRRB applicationto normal mice at the dose of 1.0 mg/kg, we obtained blood from orbital venous plexus at several time points and measured serum levels of PRRB with BIAcore 2000 using a rabbit antibody against handle region of mouse prorenin. The PRRB levels were corrected by subtracting baseline signal arising from endogenous prorenin. The PRRB levels peaked at 12 hours and was subsequently washed out by 24 hours.


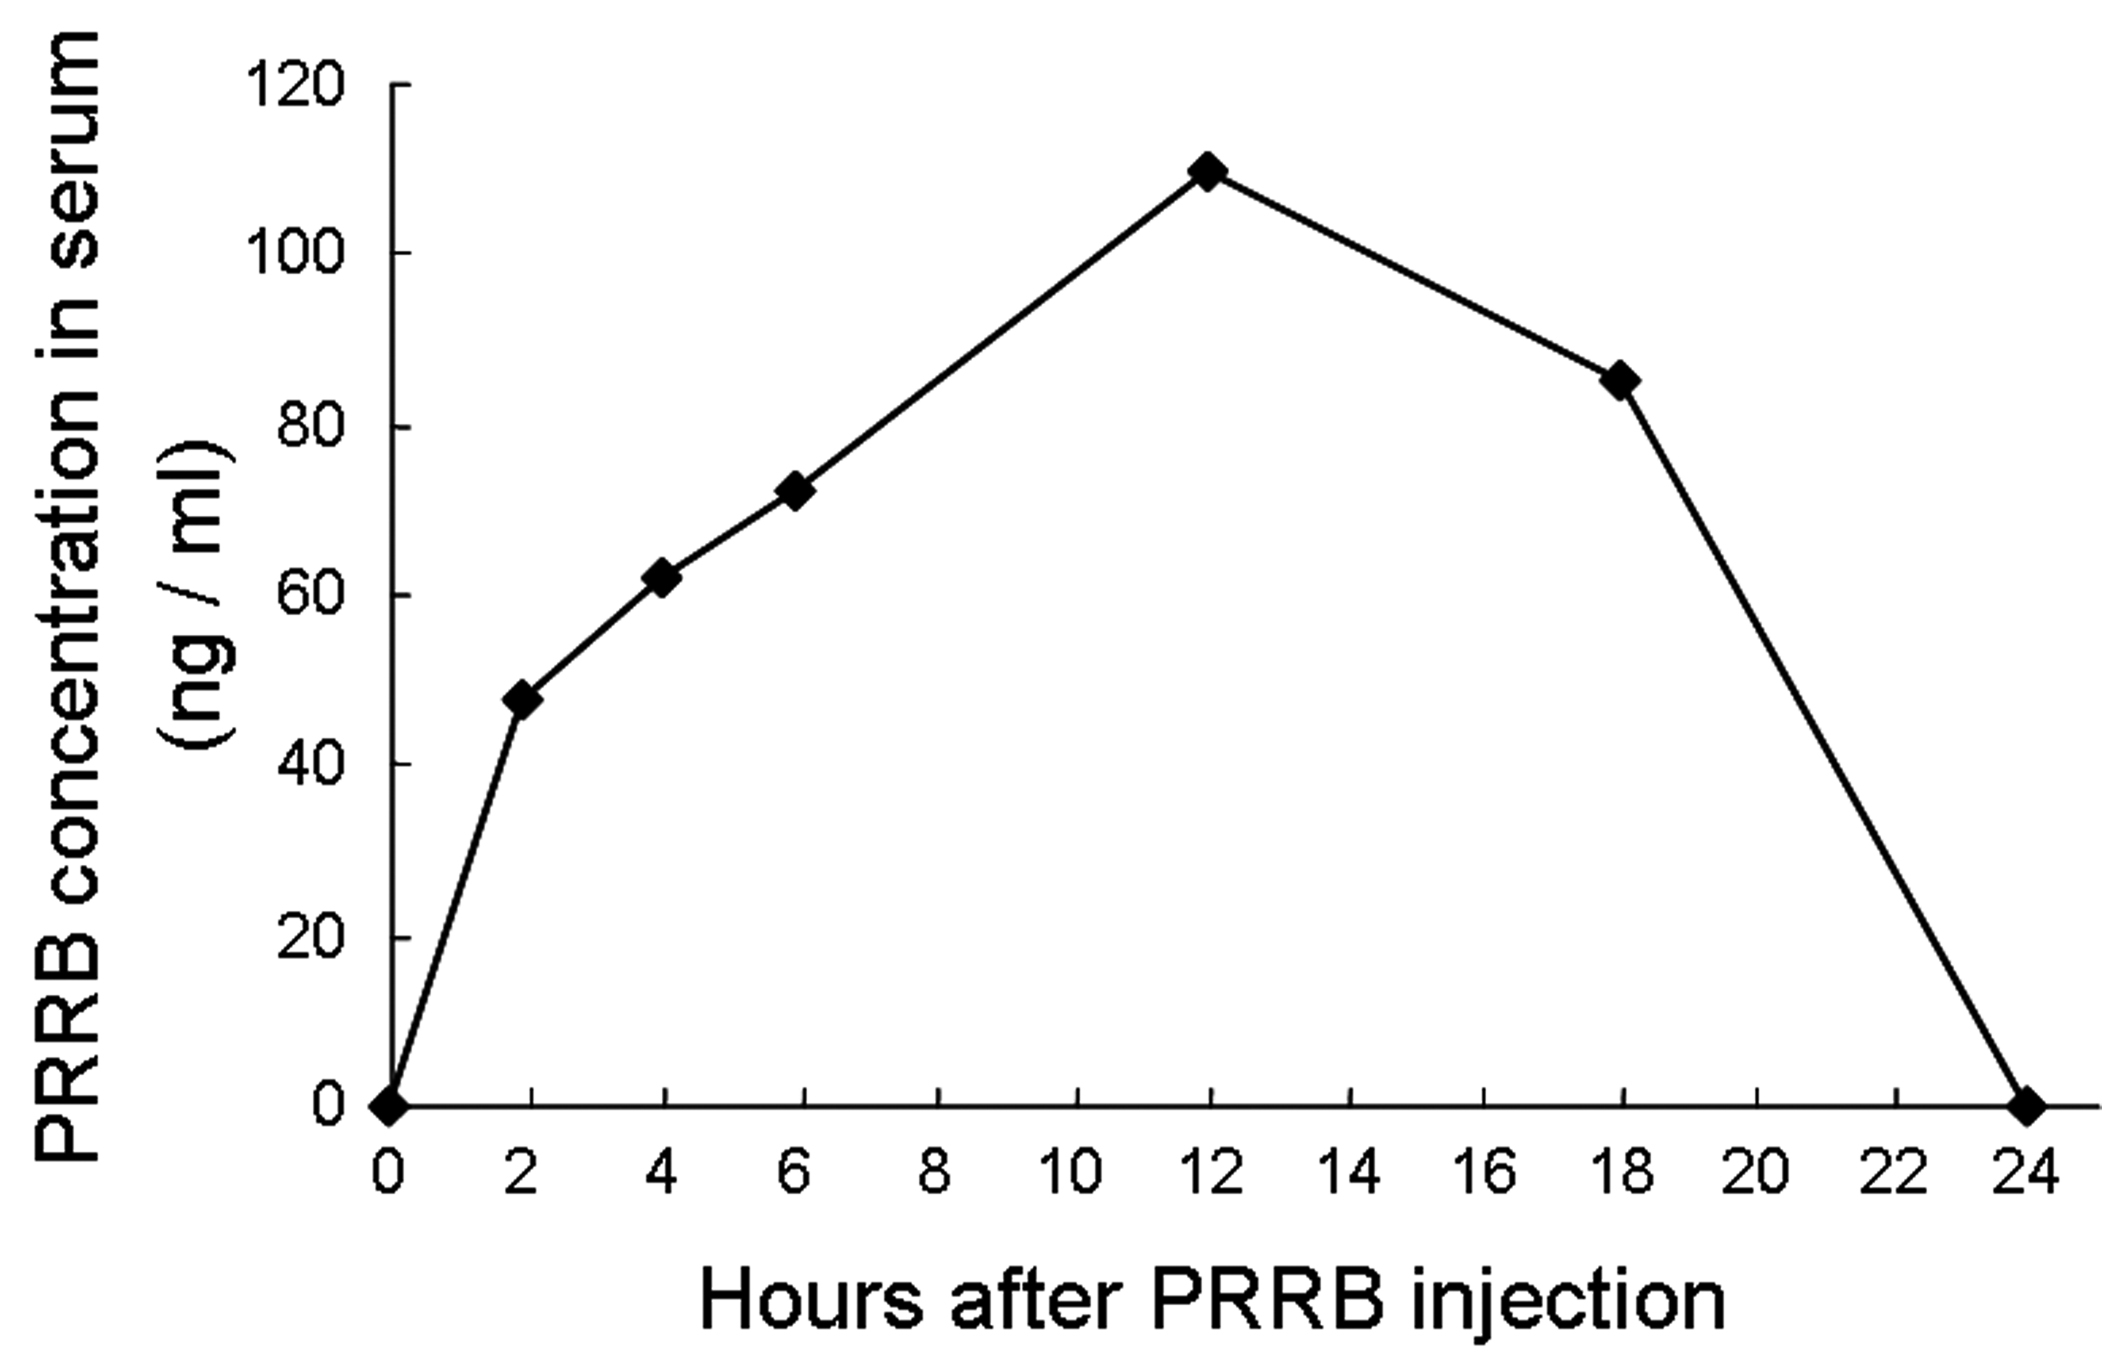

Supplement: db08-0254_online_appendix.doc [file db08-0254_online_appendix.doc]
